# Supplementary material for: It can be safe to discontinue oral anticoagulants after successful atrial fibrillation ablation: A systematic review and meta-analysis of cohort studies
Source: PubMed Central journal article supplement (PMC10589570; doi:10.1097/md.0000000000035518), 2023-10-20
Supplement: medi-102-e35518-s001.pdf [file medi-102-e35518-s001.pdf]

**Supplementary Table 1. Literature Search strategy**

|                                                                                                                                                                                                                                                                                                                                                                                                                                                                                                                                                                                                                                                                                                                                                                                                                                                                                                                                                                                                                                                                                                                                                                                                                                                                                                                                                                                                                                                                                   |                    |
|-----------------------------------------------------------------------------------------------------------------------------------------------------------------------------------------------------------------------------------------------------------------------------------------------------------------------------------------------------------------------------------------------------------------------------------------------------------------------------------------------------------------------------------------------------------------------------------------------------------------------------------------------------------------------------------------------------------------------------------------------------------------------------------------------------------------------------------------------------------------------------------------------------------------------------------------------------------------------------------------------------------------------------------------------------------------------------------------------------------------------------------------------------------------------------------------------------------------------------------------------------------------------------------------------------------------------------------------------------------------------------------------------------------------------------------------------------------------------------------|--------------------|
| <p><b>Literature Search strategy via PubMed</b></p> <p>#1 atrial fibrillation[Title/Abstract]<br/> #2 atrial fibrillation[MeSH Terms]<br/> #3 (atrial[Title/Abstract] OR atrium[Title/Abstract] OR auricular) fibrillat*[Title/Abstract]<br/> #4 ablation[Title/Abstract]<br/> #5 catheter ablation[MeSH Terms]<br/> #6 catheter ablat*[Title/Abstract]<br/> #7 percutaneous catheter*[Title/Abstract]<br/> #8 anticoagula*[Title/Abstract]<br/> #9 (dabigatran[Title/Abstract]) or (apixaban[Title/Abstract]) or (rivaroxaban[Title/Abstract]) or (edoxaban[Title/Abstract])<br/> #10 vitamin K antagon*[Title/Abstract]<br/> #11 vitamin k inhibitor*[Title/Abstract]<br/> #12 vka[Title/Abstract]<br/> #13 antivitamin k[Title/Abstract]<br/> #14 warfarin[Title/Abstract]<br/> #15 non-vitamin K antagonist oral anticoagulant[Title/Abstract]<br/> #16 direct oral anticoagulant[Title/Abstract]<br/> #17 (NOAC[Title/Abstract]) OR (DOAC[Title/Abstract])<br/> #18 #1 or #2 or #3<br/> #19 #4 or #5 or #6 or #7<br/> #20 #8 or #9 or #10 or #11 or #12 or #13 or #14 or #15 or #16 or #17<br/> #21 #18 and #19 and #20<br/> #22 animals[mh] NOT humans[mh]<br/> #23 #21 NOT #22<br/> #24 cohort studies[mesh:noexp] or longitudinal studies[mesh:noexp] or follow-up studies[mesh:noexp] pr prospective studies[mesh:noexp] or retrospective studies[mesh:noexp] or cohort[tiab] or longitudinal[tiab] or prospective[tiab] or retrospective[tiab]<br/> #25 #23 and #24</p> | <p><b>2131</b></p> |
| <p><b>Literature Search strategy via Embase</b></p> <p>#1 'atrial fibrillation'/exp OR 'atrial fibrillation'<br/> #2 ablation:ti,ab,kw<br/> #3 #1 and #2<br/> #4 dabigatran:ti,ab,kw OR apixaban:ti,ab,kw OR rivaroxaban:ti,ab,kw OR edoxaban:ti,ab,kw OR 'vitamin k antagon*':ti,ab,kw OR warfarin:ti,ab,kw OR 'non-vitamin k antagonist oral anticoagulant':ti,ab,kw OR 'direct oral anticoagulant':ti,ab,kw OR noac:ti,ab,kw OR doac:ti,ab,kw<br/> #5 #3 and #4</p>                                                                                                                                                                                                                                                                                                                                                                                                                                                                                                                                                                                                                                                                                                                                                                                                                                                                                                                                                                                                            | <p><b>1733</b></p> |

**Literature Search strategy via Web of Science****203**

#1 TS=(atrial fibrillation)

#2 TS=(ablation)

#3 #1 and #2

#4 (((TS=(anticoagula\*)) OR TS=(dabigatran)) OR TS=(apixaban)) OR  
TS=(rivaroxaban) OR TS=(edoxaban)

#5 (TS=(vitamin K antagon\*)) OR TS=(warfarin)

#6 (((TS=(non-vitamin K antagonist oral anticoagulant)) OR TS=(direct oral  
anticoagulant)) OR TS=(NOAC)) OR TS=(DOAC)

#7 #4 or #5 or #6

#8 TS=(cohort)

#9 #3 and #7 and #8
